# Supplementary material for: Plasma Neutrophil Gelatinase-Associated Lipocalin and Predicting Clinically Relevant Worsening Renal Function in Acute Heart Failure
Source: PubMed Central journal article supplement (PMC5535961; doi:10.3390/ijms18071470), 2017-07-08

**Table S1. Baseline characteristics across creatinine tertiles**

| Creatinine tertiles                 | 1 [0.9-1.2]<br>(n=559) | 1.4 [1.3-1.5]<br>(n=445) | 2 [1.8-2.4]<br>(n=443) | P-lin      |  |
|-------------------------------------|------------------------|--------------------------|------------------------|------------|--|
| <b>Demographics</b>                 |                        |                          |                        |            |  |
| Sex (% Male)                        | 53.7 (300)             | 67.2 (299)               | 80.1 (355)             | <0.001     |  |
| Age (years)                         | 69.2±12                | 70.9±11                  | 71.1±10.3              | 0.008      |  |
| BMI (kg/m2)                         | 28.2±6.5               | 28.9±5.8                 | 29.1±5.3               | 0.019      |  |
| LVEF (% (n))                        | 33.7±13.1              | 32.9±13.5                | 30.9±12                | 0.021      |  |
| Systolic Blood Pressure (mmHg)      | 125.5±17.1             | 125.2±17.4               | 124.1±18               | 0.187      |  |
| Diastolic Blood Pressure (mmHg)     | 75.2±11.4              | 75.1±11.7                | 72.8±11.6              | 0.001      |  |
| Heart Rate (beats/min)              | 83±16.1                | 81.3±15.9                | 78.4±15.3              | <0.001     |  |
| Rolofylline administration (% (n))  | 63.7 (356)             | 68.5 (305)               | 69.5 (308)             | 0.045      |  |
| <b>Clinical Profile</b>             |                        |                          |                        |            |  |
| Orthopnea (% (n))                   | 96.2 (532)             | 96.8 (428)               | 95.7 (422)             | 0.711      |  |
| Rales (% (n))                       | 66 (369)               | 64.7 (288)               | 59.3 (262)             | 0.031      |  |
| Edema (% (n))                       | 68 (380)               | 71 (316)                 | 69.1 (306)             | 0.663      |  |
| Jugular venous pressure (% (n))     | 39.7 (200)             | 43.6 (170)               | 44.1 (173)             | 0.168      |  |
| <b>Medical History</b>              |                        |                          |                        |            |  |
| Hypertension (% (n))                | 78.4 (438)             | 81.1 (361)               | 79.7 (353)             | 0.563      |  |
| Diabetes Mellitus (% (n))           | 38.6 (216)             | 43.8 (195)               | 53.4 (236)             | <0.001     |  |
| Hypercholesterolemia (% (n))        | 36.7 (205)             | 50.2 (223)               | 54.9 (243)             | <0.001     |  |
| Smoking (% (n))                     | 15.9 (89)              | 18.5 (82)                | 20.4 (90)              | 0.070      |  |
| Ischemic Heart Disease (% (n))      | 67.9 (378)             | 67.6 (301)               | 75.6 (335)             | 0.010      |  |
| Myocardial Infarction (% (n))       | 46 (256)               | 46.6 (207)               | 57.6 (255)             | <0.001     |  |
| PCI (% (n))                         | 19.7 (109)             | 20.8 (92)                | 28.4 (124)             | 0.002      |  |
| CABG (% (n))                        | 11.9 (66)              | 20.8 (92)                | 29.2 (128)             | <0.001     |  |
| Peripheral Vascular Disease (% (n)) | 8.6 (48)               | 11.7 (52)                | 13.8 (61)              | 0.009      |  |
| Atrial Fibrillation (% (n))         | 53.9 (300)             | 59.3 (262)               | 53.5 (237)             | 0.992      |  |
| NYHA Class                          |                        |                          |                        | <0.001     |  |
|                                     | I-II                   | 15.7 (88)                | 16.2 (72)              | 17.4 (77)  |  |
|                                     | III                    | 42 (235)                 | 47.6 (212)             | 50.6 (224) |  |
|                                     | IV                     | 37.6 (210)               | 30.3 (135)             | 27.1 (120) |  |
| ICD therapy (% (n))                 | 7.5 (42)               | 14.6 (65)                | 20.1 (89)              | <0.001     |  |
| CRT therapy (% (n))                 | 4.8 (27)               | 10.6 (47)                | 12.2 (54)              | <0.001     |  |
| Stroke (% (n))                      | 7.2 (40)               | 11.2 (50)                | 11.5 (51)              | 0.017      |  |
| COPD (% (n))                        | 19 (106)               | 17.8 (79)                | 22.4 (99)              | 0.201      |  |
| <b>Prior Medication Use</b>         |                        |                          |                        |            |  |
| ACE inhibitors or ARB (% (n))       | 76.2 (426)             | 77.5 (345)               | 72 (319)               | 0.149      |  |
| Beta blockers (% (n))               | 69.8 (390)             | 76.2 (339)               | 78.3 (347)             | 0.002      |  |
| MRAs (% (n))                        | 47.8 (267)             | 48.3 (215)               | 45.1 (200)             | 0.433      |  |
| Calcium Antagonists (% (n))         | 11.3 (63)              | 13.3 (59)                | 16.5 (73)              | 0.017      |  |
| Nitrates (% (n))                    | 23.3 (130)             | 26.5 (118)               | 32.7 (145)             | 0.001      |  |
| Digoxin (% (n))                     | 36.5 (204)             | 30.8 (137)               | 23.3 (103)             | <0.001     |  |
| <b>Laboratory Values</b>            |                        |                          |                        |            |  |
| eGFR (mL/min/1.73m2)                | 68 [61-78]             | 48.6 [42-55]             | 32 [27-39]             | <0.001     |  |
| NGAL (ng/ml)                        | 57 [41-84]             | 81 [58-127]              | 137 [95-204]           | <0.001     |  |
| Blood Urea Nitrogen (mg/dL)         | 22 [18-26]             | 30 [25-38]               | 45 [36-59]             | <0.001     |  |
| Sodium (mmol/L)                     | 140 [138-143]          | 140 [137-143]            | 140 [137-142]          | <0.001     |  |
| Potassium (mmol/L)                  | 4.2 [3.9-4.6]          | 4.3 [3.9-4.6]            | 4.4 [3.9-4.8]          | <0.001     |  |
| Hemoglobin (g/dL)                   | 13.1±1.9               | 12.8±1.9                 | 12.3±2                 | <0.001     |  |
| Anemia (% (n))                      | 28.1 (139)             | 40.6 (162)               | 58.5 (224)             | <0.001     |  |
| Total Cholesterol (mmol/L)          | 155±42                 | 146±46                   | 143±45                 | <0.001     |  |
| Triglycerides (mmol/L)              | 99±52                  | 98±53                    | 104±60                 | 0.105      |  |
| BNP (mg/dL)                         | 1172 [775-2232]        | 1302 [916-2152]          | 1362 [811-2773]        | 0.180      |  |

Abbreviations: BMI: Body Mass Index; LVEF: Left Ventricular Ejection Fraction; PCI: Percutaneous Coronary Intervention; CABG: Coronary Artery Bypass Graft NYHA: New York Heart Association; ICD: Internal Cardiac Defibrillator; CRT: Cardiac Resynchronization Therapy; COPD: chronic obstructive pulmonary disease; ACE: Angiotensin Converting Enzyme ; ARB: Aldosterone Receptor Blocker; MRA: Mineralocorticoid Receptor Antagonist; eGFR: estimated Glomerular Filtration Rate; BNP: Brain Natriuretic Peptide. Categorical variables are presented as: % (N).

P value: Non-parametric trend tests for categorical variables, and univariable generalized linear models with polynomial contrasts for continuous variables were used to examine trends across categories.

**Table S2. Baseline characteristics across NGAL tertiles**

| NGAL Tertiles                       | 44 [35-53]<br>(n=478) | 83 [72-94]<br>(n=477) | 166 [132-223]<br>(n=492) | P-lin      |  |
|-------------------------------------|-----------------------|-----------------------|--------------------------|------------|--|
| <b>Demographics</b>                 |                       |                       |                          |            |  |
| Sex (% Male)                        | 64.6 (309)            | 66.9 (319)            | 66.3 (326)               | 0.599      |  |
| Age (years)                         | 67.5±12               | 70.7±11.1             | 72.7±9.9                 | <0.001     |  |
| BMI (kg/m <sup>2</sup> )            | 28.5±6.6              | 28.6±5.8              | 29±5.5                   | 0.238      |  |
| LVEF (% (n))                        | 31.9±12.3             | 31.7±12.9             | 33.9±13.4                | 0.101      |  |
| Systolic Blood Pressure (mmHg)      | 124.9±17              | 124.4±17.5            | 125.6±17.8               | 0.521      |  |
| Diastolic Blood Pressure (mmHg)     | 75.8±11.3             | 74.6±11.7             | 73±11.7                  | <0.001     |  |
| Heart Rate (beats/min)              | 83.8±16.4             | 80.8±16.1             | 78.7±14.9                | <0.001     |  |
| Rolofylline administration (% (n))  | 68 (325)              | 65.4 (312)            | 67.5 (332)               | 0.871      |  |
| <b>Clinical Profile</b>             |                       |                       |                          |            |  |
| Orthopnea (% (n))                   | 96.2 (456)            | 96 (453)              | 96.5 (473)               | 0.786      |  |
| Rales (% (n))                       | 67.2 (321)            | 60.7 (289)            | 62.8 (309)               | 0.163      |  |
| Edema (% (n))                       | 69 (330)              | 70 (334)              | 68.7 (338)               | 0.906      |  |
| Jugular venous pressure (% (n))     | 43.6 (185)            | 39.6 (168)            | 43.4 (190)               | 0.950      |  |
| <b>Medical History</b>              |                       |                       |                          |            |  |
| Hypertension (% (n))                | 77.4 (370)            | 78.6 (375)            | 82.7 (407)               | 0.039      |  |
| Diabetes Mellitus (% (n))           | 35.8 (171)            | 45.7 (218)            | 52.5 (258)               | <0.001     |  |
| Hypercholesterolemia (% (n))        | 41.2 (197)            | 45.4 (216)            | 52.4 (258)               | <0.001     |  |
| Smoking (% (n))                     | 18.4 (88)             | 15.8 (75)             | 20 (98)                  | 0.533      |  |
| Ischemic Heart Disease (% (n))      | 67.3 (321)            | 69.8 (333)            | 73.3 (360)               | 0.040      |  |
| Myocardial Infarction (% (n))       | 47.9 (228)            | 48.7 (232)            | 52.5 (258)               | 0.147      |  |
| PCI (% (n))                         | 19 (90)               | 23.8 (113)            | 25.2 (122)               | 0.024      |  |
| CABG (% (n))                        | 14.2 (67)             | 20.1 (95)             | 25.4 (124)               | <0.001     |  |
| Peripheral Vascular Disease (% (n)) | 9.2 (44)              | 10.5 (50)             | 13.7 (67)                | 0.027      |  |
| Atrial Fibrillation (% (n))         | 54.1 (256)            | 55.6 (265)            | 56.5 (278)               | 0.457      |  |
| NYHA Class                          |                       |                       |                          | 0.081      |  |
|                                     | I-II                  | 15.3 (73)             | 15.5 (74)                | 18.3 (90)  |  |
|                                     | III                   | 43.5 (208)            | 46.8 (223)               | 48.8 (240) |  |
|                                     | IV                    | 36.2 (173)            | 33.5 (160)               | 26.8 (132) |  |
| ICD therapy (% (n))                 | 10.9 (52)             | 14 (67)               | 15.7 (77)                | 0.031      |  |
| CRT therapy (% (n))                 | 8.6 (41)              | 9.2 (44)              | 8.8 (43)                 | 0.931      |  |
| Stroke (% (n))                      | 9.6 (46)              | 7.5 (36)              | 12 (59)                  | 0.208      |  |
| COPD (% (n))                        | 18.4 (88)             | 20.5 (98)             | 20 (98)                  | 0.558      |  |
| <b>Prior Medication Use</b>         |                       |                       |                          |            |  |
| ACE inhibitors or ARB (% (n))       | 77.4 (370)            | 75.9 (362)            | 72.8 (358)               | 0.093      |  |
| Beta blockers (% (n))               | 72.8 (348)            | 74.4 (355)            | 75.8 (373)               | 0.283      |  |
| MRAs (% (n))                        | 50.2 (240)            | 47.4 (226)            | 43.9 (216)               | 0.049      |  |
| Calcium Antagonists (% (n))         | 9 (43)                | 11.9 (57)             | 19.3 (95)                | <0.001     |  |
| Nitrates (% (n))                    | 23.8 (114)            | 26.8 (128)            | 30.7 (151)               | 0.017      |  |
| Digoxin (% (n))                     | 35.1 (168)            | 31.2 (149)            | 25.8 (127)               | 0.002      |  |
| <b>Laboratory Values</b>            |                       |                       |                          |            |  |
| Creatinine (mg/dL)                  | 1.1 [0.9-1.3]         | 1.4 [1.1-1.7]         | 1.8 [1.4-2.3]            | <0.001     |  |
| eGFR (mL/min/1.73m <sup>2</sup> )   | 64 [52-75]            | 50 [40-63]            | 37 [29-46]               | <0.001     |  |
| Blood Urea Nitrogen (mg/dL)         | 23 [18-30]            | 29 [22-38]            | 40 [30-54]               | <0.001     |  |
| Sodium (mmol/L)                     | 140 [137-143]         | 140 [137-143]         | 140 [137-142]            | 0.043      |  |
| Potassium (mmol/L)                  | 4.2 [3.8-4.5]         | 4.2 [3.9-4.6]         | 4.4 [4-4.8]              | <0.001     |  |
| Hemoglobin (g/dL)                   | 13.4±1.9              | 12.7±1.9              | 12.2±1.9                 | <0.001     |  |
| Anemia (% (n))                      | 30.5 (129)            | 41.3 (173)            | 51.4 (223)               | <0.001     |  |
| Total Cholesterol (mmol/L)          | 153±43                | 146±47                | 146±44                   | 0.015      |  |
| Triglycerides (mmol/L)              | 97±51                 | 99±56                 | 105±57                   | 0.015      |  |
| BNP (mg/dL)                         | 1265 [794-2276]       | 1216 [868-2238]       | 1340 [864-2336]          | 0.605      |  |

Abbreviations: BMI: Body Mass Index; LVEF: Left Ventricular Ejection Fraction; PCI: Percutaneous Coronary Intervention; CABG: Coronary Artery Bypass Graft NYHA: New York Heart Association; ICD: Internal Cardiac Defibrillator; CRT: Cardiac Resynchronization Therapy; COPD: chronic obstructive pulmonary disease; ACE: Angiotensin Converting Enzyme ; ARB: Aldosterone Receptor Blocker; MRA: Mineralocorticoid Receptor Antagonist; eGFR: estimated Glomerular Filtration Rate; BNP: Brain Natriuretic Peptide. Categorical variables are presented as: % (N).

P value: Non-parametric trend tests for categorical variables, and univariable generalized linear models with polynomial contrasts for continuous variables were used to examine trends across categories.

**Table S3. Predictive value of NGAL and Creatinine for alternate WRF**

| WRF definition               | Baseline Values |          |        |
|------------------------------|-----------------|----------|--------|
|                              | Creatinine AUC  | NGAL AUC | P      |
| ≥ 0.6 mg/dL increase         | 0.637           | 0.656    | 0.429  |
| ≥ 1.2 mg/dL increase         | 0.678           | 0.689    | 0.753  |
| ≥ 25% increase               | 0.575           | 0.512    | 0.077  |
| ≥ 50% increase               | 0.515           | 0.564    | 0.395  |
| ≥ 100% increase              | 0.524           | 0.590    | 0.083  |
| ≥ 0.3 mg/dL & ≥ 25% increase | 0.532           | 0.545    | 0.710  |
| WRF definition               | Day 2 values    |          |        |
|                              | Creatinine AUC  | NGAL AUC | P      |
| ≥ 0.6 mg/dL increase         | 0.701           | 0.637    | 0.142  |
| ≥ 1.2 mg/dL increase         | 0.758           | 0.672    | 0.202  |
| ≥ 25% increase               | 0.517           | 0.512    | 0.870  |
| ≥ 50% increase               | 0.583           | 0.564    | 0.818  |
| ≥ 100% increase              | 0.659           | 0.590    | 0.509  |
| ≥ 0.3 mg/dL & ≥ 25% increase | 0.517           | 0.520    | 0.939  |
| WRF definition               | Change on day 2 |          |        |
|                              | Creatinine AUC  | NGAL AUC | P      |
| ≥ 0.6 mg/dL increase         | 0.768           | 0.493    | <0.001 |
| ≥ 1.2 mg/dL increase         | 0.818           | 0.486    | <0.001 |
| ≥ 25% increase               | 0.737           | 0.514    | <0.001 |
| ≥ 50% increase               | 0.790           | 0.514    | <0.001 |
| ≥ 100% increase              | 0.759           | 0.574    | 0.001  |
| ≥ 0.3 mg/dL & ≥ 25% increase | 0.722           | 0.506    | <0.001 |

**Table S4. Added value of NGAL on top of Creatinine for predicting WRF**

| WRF definition                          | MV Model*        |                |       | AUC   | P**   |
|-----------------------------------------|------------------|----------------|-------|-------|-------|
|                                         | OR (95% CI)      | χ <sup>2</sup> | P     |       |       |
| <b>≥ 0.3 mg/dl increase</b>             |                  |                |       |       |       |
| Creatinine                              | 1.12 (0.98-1.29) | 2.87           | 0.090 | 0.580 | 0.013 |
| NGAL                                    | 1.18 (1.04-1.35) | 6.21           | 0.013 |       |       |
| <b>≥ 0.6 mg/dl increase</b>             |                  |                |       |       |       |
| Creatinine                              | 1.33 (1.11-1.59) | 9.67           | 0.002 | 0.663 | 0.005 |
| NGAL                                    | 1.27 (1.08-1.48) | 8.86           | 0.003 |       |       |
| <b>≥ 1.2 mg/dl increase</b>             |                  |                |       |       |       |
| Creatinine                              | 1.49 (1.15-1.92) | 9.65           | 0.002 | 0.705 | 0.022 |
| NGAL                                    | 1.31 (1.05-1.59) | 7.16           | 0.007 |       |       |
| <b>≥ 25% increase</b>                   |                  |                |       |       |       |
| Creatinine                              | 0.69 (0.58-0.82) | 16.47          | 0.000 | 0.595 | 0.009 |
| NGAL                                    | 1.21 (1.05-1.4)  | 7.03           | 0.008 |       |       |
| <b>≥ 50% increase</b>                   |                  |                |       |       |       |
| Creatinine                              | 0.84 (0.65-1.07) | 1.83           | 0.176 | 0.603 | 0.013 |
| NGAL                                    | 1.27 (1.06-1.51) | 7.51           | 0.006 |       |       |
| <b>≥ 100% increase</b>                  |                  |                |       |       |       |
| Creatinine                              | 1.01 (0.67-1.44) | 0.00           | 0.953 | 0.603 | 0.058 |
| NGAL                                    | 1.31 (0.99-1.61) | 5.34           | 0.021 |       |       |
| <b>≥ 0.3 mg/dL &amp; ≥ 25% increase</b> |                  |                |       |       |       |
| Creatinine                              | 0.8 (0.67-0.94)  | 6.66           | 0.010 | 0.576 | 0.007 |
| NGAL                                    | 1.22 (1.06-1.42) | 7.69           | 0.006 |       |       |

Figure S1. Changes in serum Creatinine and NGAL in patients with and without WRF, defined as a creatinine increase of  $\geq 25\%$

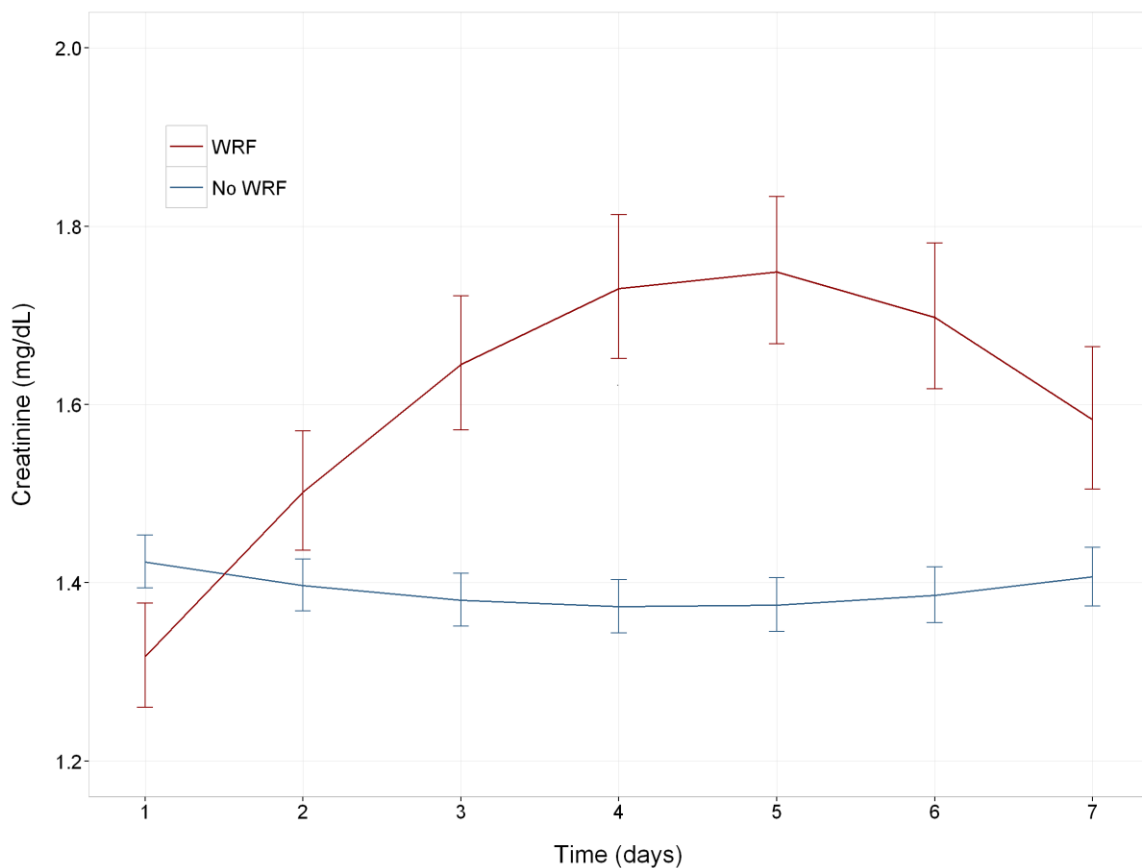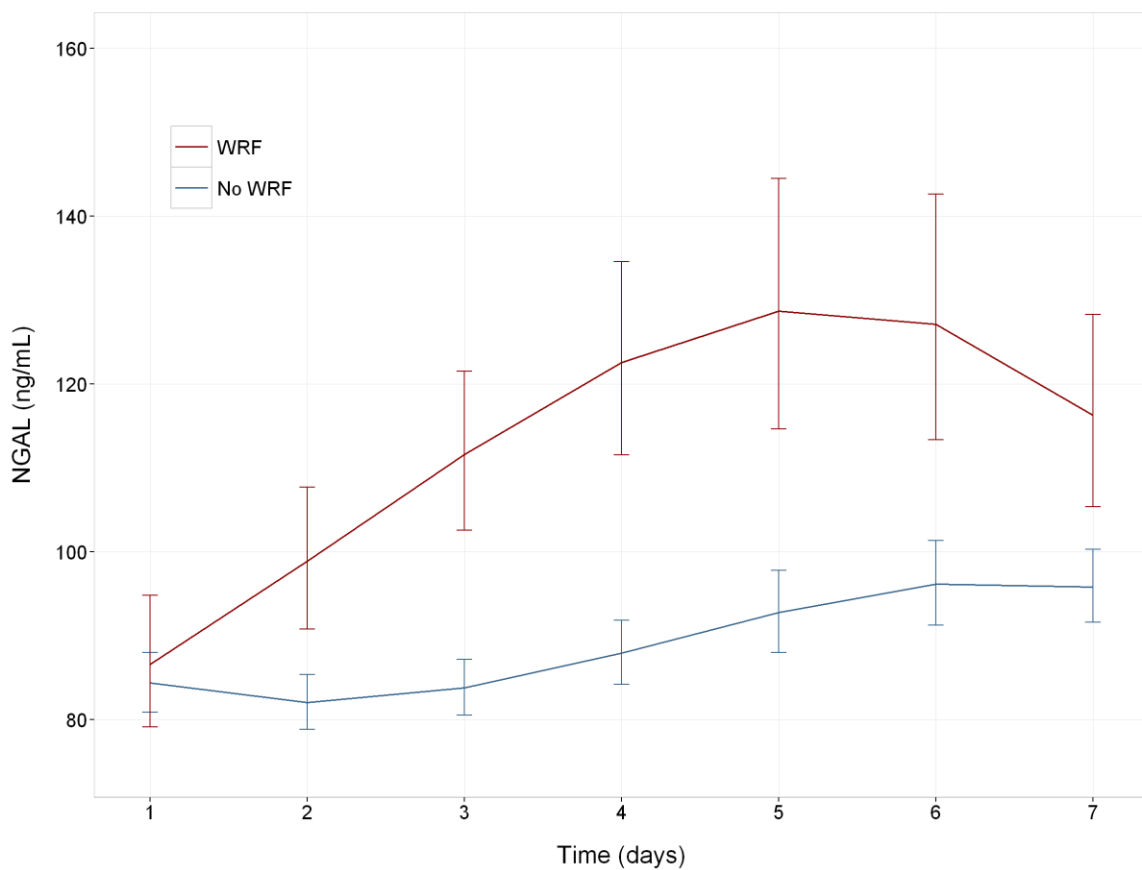

Least square means with 95% confidence intervals

WRF: worsening renal function, defined as creatinine rise  $\geq 25\%$  by day 4

Figure S2. Changes in serum Creatinine and NGAL in patients with and without WRF, defined as a combined creatinine increase of  $\geq 0.3$  mg/dL and  $\geq 25\%$

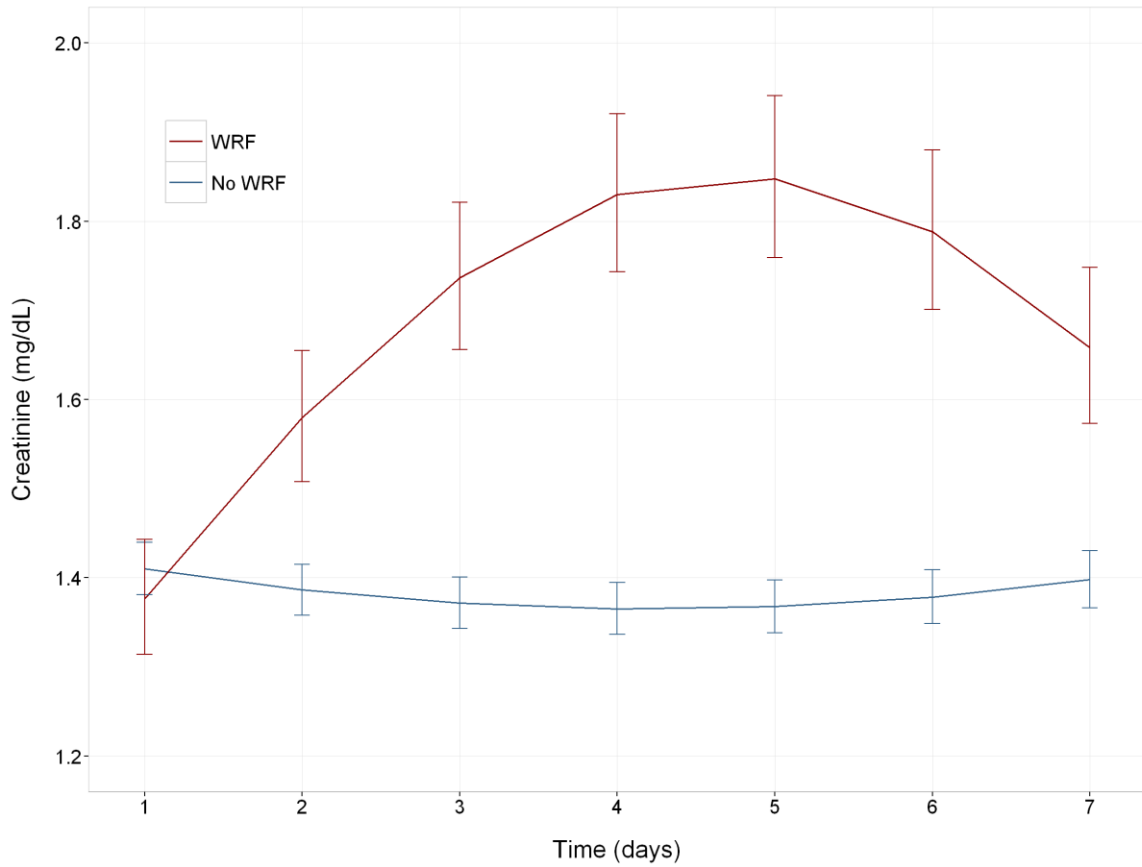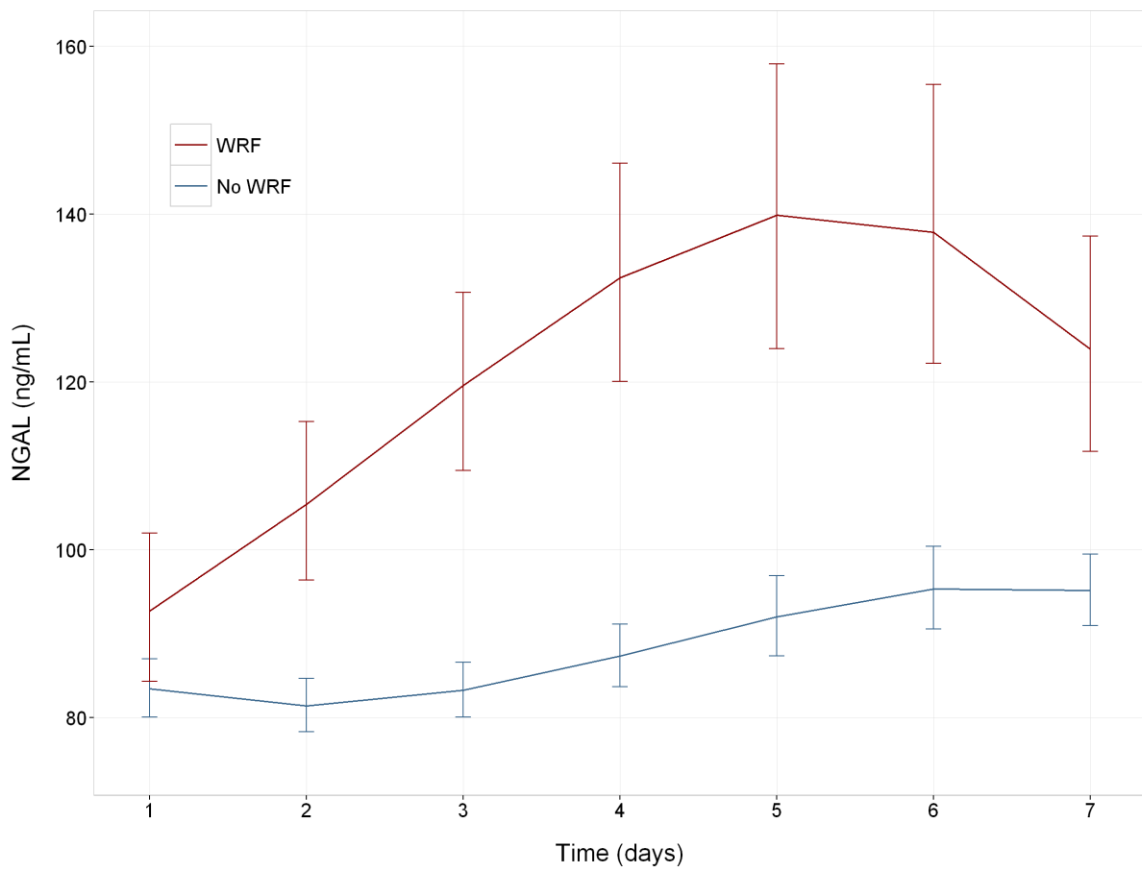

Least square means with 95% confidence intervals over time

WRF: worsening renal function, defined as combined creatinine increase of  $\geq 0.3$  mg/dL and  $\geq 25\%$  by day 4

Figure S3. Relative changes in serum Creatinine and NGAL in patients with WRF, defined as a creatinine increase of  $\geq 25\%$

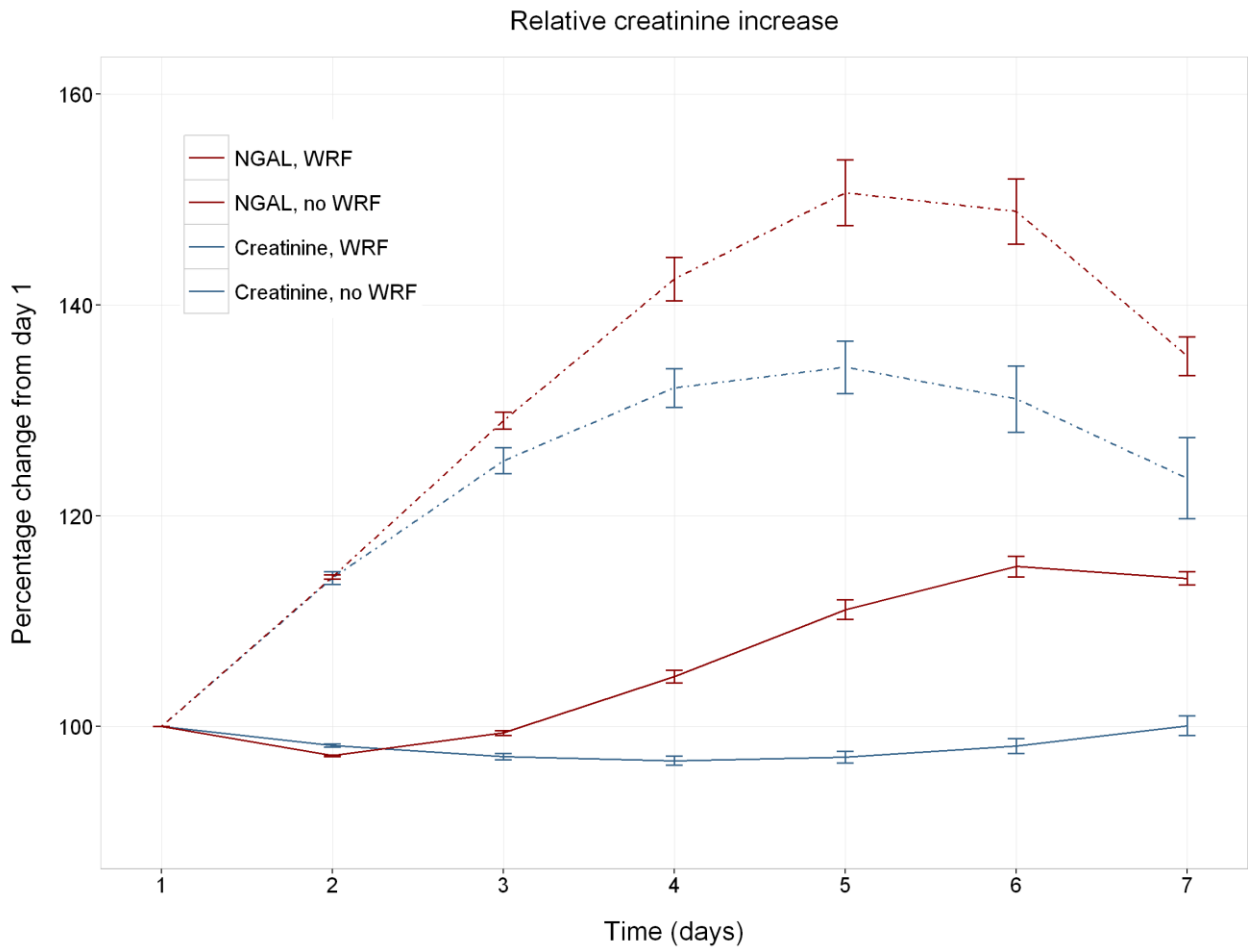



Figure S4. Relative changes in serum Creatinine and NGAL in patients with WRF, defined as a combined creatinine increase of  $\geq 0.3$  mg/dL and  $\geq 25\%$

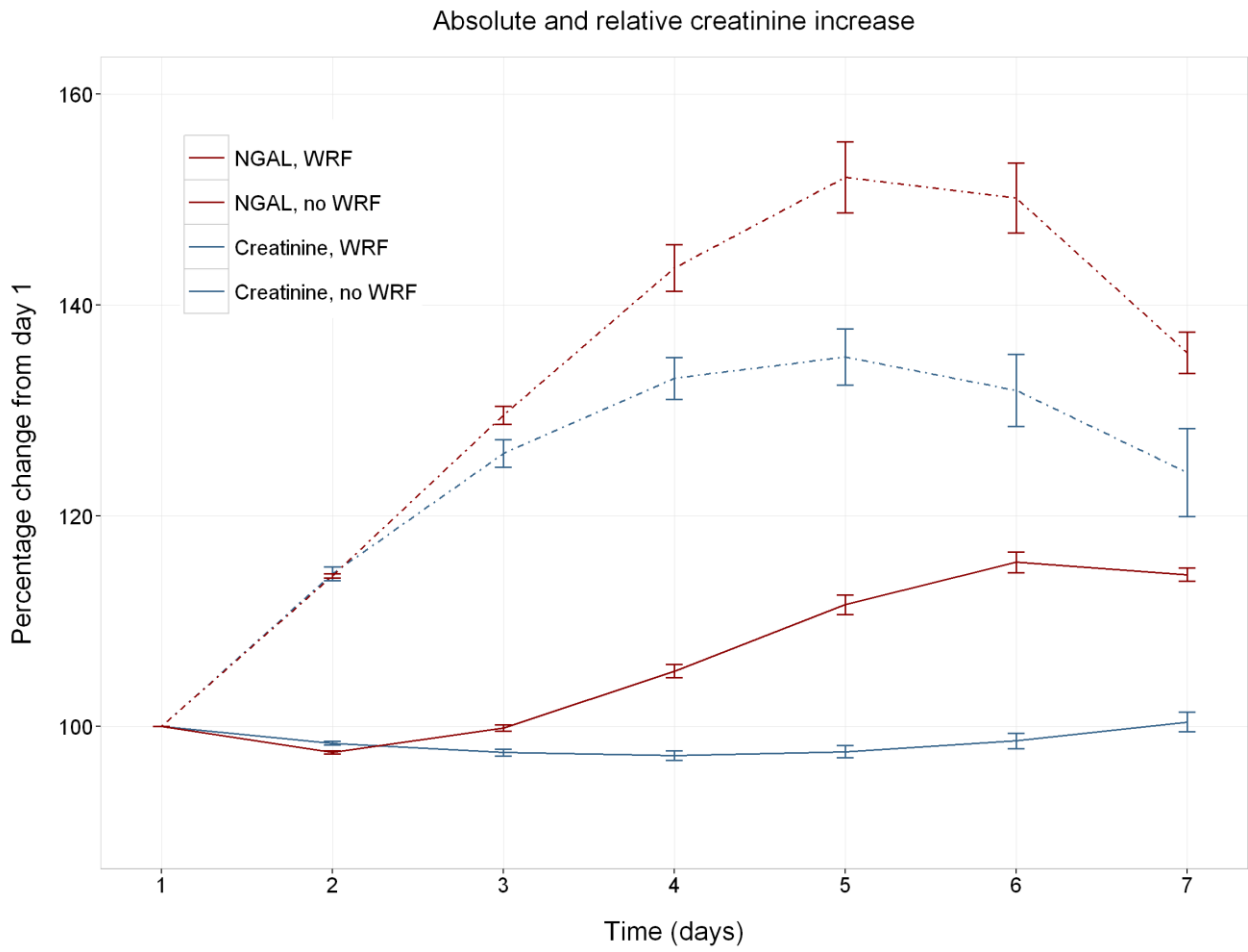

Figure S5. Relationships of baseline NGAL, creatinine and absolute creatinine change with 180-day mortality and the 60-day composite endpoint

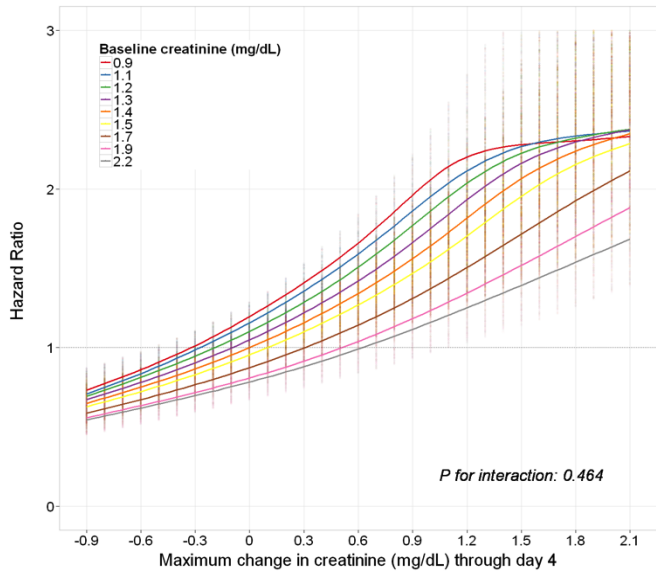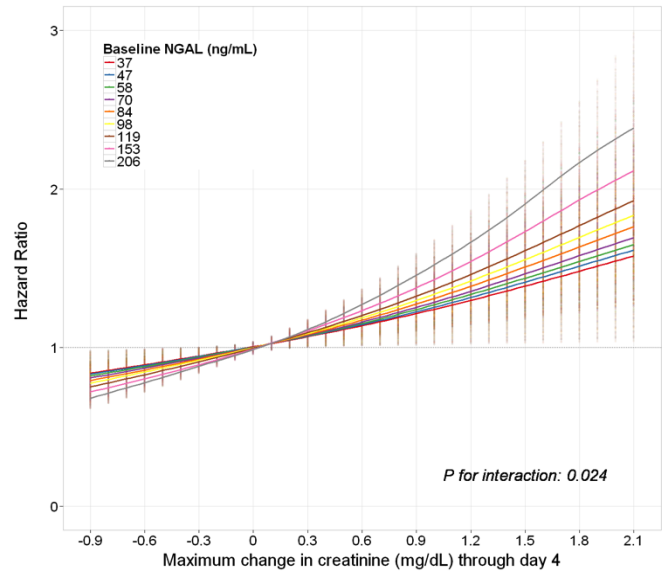

Supplement: ijms-18-01470-s001.pdf [file ijms-18-01470-s001.pdf]
